## Pulmonary function and risk of Alzheimer dementia: two-sample Mendelian randomization study

Tom C. Russ,<sup>1,4\*</sup> Sarah E. Harris,<sup>4</sup> G. David Batty<sup>1,5</sup>

1. Alzheimer Scotland Dementia Research Centre, University of Edinburgh;
2. Edinburgh Dementia Prevention Group, University of Edinburgh;
3. Division of Psychiatry, Centre for Clinical Brain Sciences, University of Edinburgh;
4. Lothian Birth Cohorts, Department of Psychology, University of Edinburgh;
5. UCL Research Department of Epidemiology & Public Health, University College London

\* Correspondence to: Dr Tom Russ, Alzheimer Scotland Dementia Research Centre, University of Edinburgh, 7 George Square, Edinburgh, EH8 9JZ, UK  
Telephone: +44 (0)131 650 4340; Email: [T.C.Russ@ed.ac.uk](mailto:T.C.Russ@ed.ac.uk)

**Manuscript statistics:** 999 words with one table

**Funding:** This article received no specific funding. The Alzheimer Scotland Dementia Research Centre is funded by Alzheimer Scotland. The Lothian Birth Cohorts are funded by Age UK. TCR is employed by the UK National Health Service and the Scottish Government. GDB is supported by the UK Medical Research Council (MR/P023444/1) and the US National Institute on Aging (1R56AG052519-01; 1R01AG052519-01A1). All researchers are independent of their funders.

**Conflicts of interest:** none

**Author contributions:** TCR and GDB conceived the study, SEH obtained and analysed the data, TCR drafted the manuscript and all authors revised it for intellectual content. TCR is the guarantor of the article.

1 **ABSTRACT**

2 Dementia is a major global public health concern and in addition to recognised risk factors  
3 there is emerging evidence that poorer pulmonary function is linked with subsequent  
4 dementia risk. However, it is unclear if this observed association is causal or whether it might  
5 result from confounding. Therefore, we present the first two-sample Mendelian  
6 randomisation study of the association between pulmonary function and Alzheimer dementia  
7 using the most recent genome-wide association studies to produce instrumental variables for  
8 both. We found no evidence of a causal effect of reduced Forced Expiratory Volume in 1  
9 second (FEV<sub>1</sub>) or Forced Vital Capacity (FVC) on Alzheimer dementia risk (both  $P > 0.35$ ).  
10 However, the FEV<sub>1</sub>/FVC ratio was associated with Alzheimer dementia risk with, in fact,  
11 superior function predicting an increased dementia risk (OR 1.12, 95%CI 1.02-1.23;  
12  $P = 0.016$ ) which may result from survivor bias. While we can conclude that there is no causal  
13 link between impaired pulmonary function and Alzheimer dementia, our study sheds less light  
14 on potential links with other types of dementia.

15 Dementia is a major and growing global public health problem.<sup>1</sup> The risk of Alzheimer disease  
16 is thought to be raised in the presence of a relatively small series of environmental and genetic  
17 factors. These include lower educational attainment, hypertension, obesity, diabetes, cigarette  
18 smoking, and the APOE ε4 allele.<sup>2</sup>

19

20 Recent findings from observational studies also suggest that impaired pulmonary function is  
21 consistently associated with a ~40% elevation in the risk of later dementia.<sup>3</sup> While there is  
22 mechanistic evidence to support this association — including the hypoxic effect of extended  
23 sub-optimal ventilatory function<sup>4</sup> — crucially, given the observational nature of these studies,  
24 it is unclear if this relationship is causal. An obstacle to drawing causal inference from such  
25 studies is the perennial problem of confounding —that, in the case of pulmonary function,  
26 the characteristics of people in the low functioning group differ from the unexposed in a  
27 variety of ways that may explain the association. Investigators attempt to include as many  
28 relevant covariates as possible but the possibility of confounding by unmeasured or  
29 imprecisely quantified factors is universal. Mendelian randomisation (MR) has been seen as a  
30 possible remedy to this problem<sup>5</sup> and has been extended to a two-sample MR where genetic  
31 associations for the exposure and outcome are obtained from independent samples.<sup>6</sup>

32 Accordingly, for the first time to our knowledge, we present a two-sample MR study to clarify  
33 whether the observed association between poorer pulmonary function and subsequent  
34 Alzheimer dementia (AD) is causal.

35

## 36 **METHODS**

37 We ran a two-sample MR using summary data from the UKBiobank/SpiroMeta Consortium  
38 Genome-Wide Association Study (GWAS) which comprised 400,102 individuals.<sup>7</sup> We

39 derived two genetic instruments for lung function: Forced Expiratory Volume in one second  
40 (litres; FEV<sub>1</sub>) and Forced Vital Capacity (litres; FVC). Of the 279 SNPs associated with lung  
41 function, but not smoking behaviour, only those related to the relevant trait with  $P < 5 \times 10^{-8}$   
42 and the same direction of effect in UKBiobank and SpiroMeta were used as genetic  
43 instruments. In addition, we included a more exploratory measure — the FEV<sub>1</sub>/FVC ratio —  
44 which has been used in the diagnosis of chronic obstructive pulmonary disease whereby lower  
45 values are more suggestive of this condition.<sup>8</sup> For the outcome we used summary data from  
46 the most recent GWAS which included 21,982 people with AD and 41,944 controls.<sup>9</sup> The  
47 models used the TwoSampleMR R package.<sup>10</sup> Since this study used publicly available data, no  
48 ethical approval was required.

49

## 50 RESULTS

51 **Table 1** shows the relationship between lung function and the subsequent risk of AD. There  
52 was no evidence of a causal effect of poorer lung function —using FEV<sub>1</sub> or FVC — on AD  
53 risk (both  $P > 0.35$ ). However, each SD increase in FEV<sub>1</sub>/FVC ratio (indicating superior lung  
54 function) was associated with an increased AD risk (OR, 95%CI 1.12, 1.02-1.23;  $P = 0.016$ ).  
55 The MR Egger intercept for the latter indicates little horizontal pleiotropy ( $\beta = 0.0002$ ,  
56  $P = 0.96$ ) and the inverse-variance weighted Q-value (177.7,  $P = 0.08$ ) suggests no substantial  
57 heterogeneity. Using the weighted median method gave a similar result (1.15, 1.00-1.31;  
58  $P = 0.048$ ).

59

## 60 DISCUSSION

61 We found that the observed association between lower pulmonary function and AD risk was  
62 not supported as being causal in the present MR analyses. Thus, it is possible that the original

63 relationship resulted from confounding by one or more unmeasured or poorly measured  
64 confounders. Multiple candidates exist including an adverse intrauterine environment leading  
65 to reduced maximal lung function, exposure to environmental factors (e.g., tobacco smoke,  
66 atmospheric pollution) affecting lung function and development, and socioeconomic factors  
67 (poverty, educational failure, and less-advantaged social class). In our systematic review and  
68 meta-analysis, most included studies took account of smoking and cardiovascular disease risk  
69 factors, and slightly fewer included height.<sup>3</sup> Socioeconomic position was variably accounted  
70 for and there was little coverage of the whole life course in terms of all included covariables.

71

72 The FEV<sub>1</sub>/FVC ratio has not been routinely examined in relation to dementia risk.<sup>3</sup> However,  
73 we found a link between higher pulmonary function captured by this measure and increased  
74 AD risk. This may possibly be explained by survivor bias, with participants with poorer  
75 pulmonary function dying before they reach late life.

76

77 MR uses genetic variants which are randomly allocated at conception – and therefore  
78 generally independent of confounders that may otherwise bias the association of interest  
79 when using observational methods – as proxies for environmental exposures. This assumes  
80 that the genetic variants are: (1) associated with the exposure; (2) only associated with the  
81 outcome of interest via their effect on the exposure; and 3) independent of confounders. It  
82 also relies on the exposure being accurately measured in the GWAS from which the  
83 instrument is derived. Pulmonary function was accurately measured with rigorous quality  
84 control in both UKBiobank (87.2% participants) and the individual studies of the SpiroMeta  
85 consortium.<sup>7</sup> It is unlikely that collider bias due to smoking and height adjustment in the lung  
86 function GWAS explains the observed association, as SNPs associated with smoking

87 behaviour were excluded and a sensitivity analysis excluding the 12 SNPs included in our  
88 instrument which were associated with height in UKBiobank did not affect our conclusions.  
89 The AD GWAS included 46 case-control studies from four consortia.<sup>9</sup> These studies used  
90 various methods of ascertaining dementia, with multiple diagnostic criteria being applied.  
91 Some studies used clinical diagnoses and some identified Alzheimer-type pathology post  
92 mortem. This variation is likely to affect the applicability of the GWAS findings in our  
93 analysis.

94

95 In contrast to the instrumental AD variable used here, most observational studies use a more  
96 general category of ‘dementia.’<sup>13,9</sup> This lack of clarity is common and the multiple diseases  
97 which cause the dementia syndrome — such as Alzheimer disease, cerebrovascular disease,  
98 Lewy body disease, and Fronto-Temporal Lobar Degenerative syndromes — are frequently  
99 conflated. Depending on the methodology used to ascertain dementia status, clarifying an  
100 individual’s precise diagnosis can be challenging. For example, death certificates frequently  
101 only record the broad dementia syndrome. Thus, while we can conclude that there is no  
102 causal link between impaired pulmonary function and AD, our study sheds less light on  
103 potential links with other types of dementia. It is plausible that there may be a different  
104 relationship between pulmonary function and vascular dementia, for instance.

## REFERENCES

1. Prince MJ, Wimo A, Guerchet M, Ali G-C, Wu Y-T, Prina AM. *World Alzheimer Report 2015. The Global Impact of Dementia: an analysis of prevalence, incidence, cost and trends*. London: Alzheimer's Disease International; 2015.
2. Livingston G, Huntley J, Sommerlad A, et al. Dementia prevention, intervention, and care: 2020 report of the Lancet Commission. *The Lancet*. 2020;396(10248):413-446.
3. Russ TC, Kivimaki M, Batty GD. Respiratory Disease and Lower Pulmonary Function as Risk Factors for Dementia: A Systematic Review With Meta-analysis. *Chest*. 2020.
4. Horsburgh K, Wardlaw JM, van Agtmael T, et al. Small vessels, dementia and chronic diseases – molecular mechanisms and pathophysiology. *Clinical Science*. 2018;132(8):851-868.
5. Davey Smith G, Ebrahim S. 'Mendelian randomization': can genetic epidemiology contribute to understanding environmental determinants of disease? *International Journal of Epidemiology*. 2003;32(1):1-22.
6. Hartwig FP, Davies NM, Hemani G, Davey Smith G. Two-sample Mendelian randomization: avoiding the downsides of a powerful, widely applicable but potentially fallible technique. *International Journal of Epidemiology*. 2017;45(6):1717-1726.
7. Shrine N, Guyatt AL, Erzurumluoglu AM, et al. New genetic signals for lung function highlight pathways and chronic obstructive pulmonary disease associations across multiple ancestries. *Nature Genetics*. 2019;51(3):481-493.
8. Rabe KF, Hurd S, Anzueto A, et al. Global strategy for the diagnosis, management, and prevention of chronic obstructive pulmonary disease: GOLD executive summary. *Am J Respir Crit Care Med*. 2007;176(6):532-555.
9. Kunkle BW, Grenier-Boley B, Sims R, et al. Genetic meta-analysis of diagnosed Alzheimer's disease identifies new risk loci and implicates A $\beta$ , tau, immunity and lipid processing. *Nature Genetics*. 2019;51(3):414-430.
10. Hemani G, Tilling K, Davey Smith G. Orienting the causal relationship between imprecisely measured traits using GWAS summary data. *PLOS Genetics*. 2017;13(11):e1007081.



**Table 1.** Estimates of the association between pulmonary function (FEV<sub>1</sub>, FVC, and FEV<sub>1</sub>/FVC ratio) and Alzheimer dementia from a two-sample Mendelian randomization

|                             | <b>N SNPs</b> | <b>F-<br/>statistic</b> | <b>Method</b>     | <b>OR (95% CI)</b> | <b>P</b> |
|-----------------------------|---------------|-------------------------|-------------------|--------------------|----------|
| FEV <sub>1</sub>            | 179           | 70.0                    | Inverse variance  |                    |          |
|                             |               |                         | weighted          | 1.06 (0.94-1.19)   | 0.355    |
| FVC                         | 133           | 65.1                    | Inverse variance  |                    |          |
|                             |               |                         | weighted          | 0.98 (0.85-1.14)   | 0.815    |
| FEV <sub>1</sub> /FVC ratio | 154           | 128.3                   | Inverse variance  |                    |          |
|                             |               |                         | weighted          | 1.12 (1.02-1.23)   | 0.016    |
|                             |               |                         | MR Egger estimate | 1.11 (0.90-1.38)   | 0.3188   |
|                             |               |                         | Weighted median   | 1.15 (1.00-1.31)   | 0.0480   |
